# Supplementary material for: Blood Flow Lateralization and Collateral Compensatory Mechanisms in Patients With Carotid Artery Stenosis
Source: PubMed Central journal article supplement — Stroke. 2019 Apr 2;50(5):1081–8. doi: 10.1161/STROKEAHA.119.024757 (PMC6485302; doi:10.1161/strokeaha.119.024757), 2019-04-02
Supplement: str-50-1081-s001.pdf [file str-50-1081-s001.pdf]

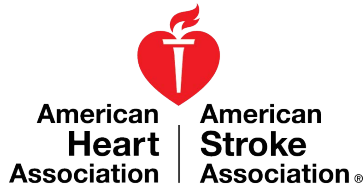

## Acknowledgment Permission Form

---

**Journal Stroke** \_\_\_\_\_

**Manuscript Number** \_\_\_\_\_

**First Author** Laleh Zarrinkoob

**Title of Work** Blood flow lateralization and collateral compensatory mechanisms in n

Authors must provide written permission/approval from all individuals mentioned by name in the Acknowledgments section of a submitted manuscript. By signing this form, any and all acknowledged persons therefore state that they have read and approved the mention of their names in the Acknowledgment section of the aforementioned paper.

|           |                      |           |                                                                                          |      |                      |
|-----------|----------------------|-----------|------------------------------------------------------------------------------------------|------|----------------------|
| Name (1)  | <u>Kristin Nyman</u> | Signature | <u></u> | Date | <u>190122</u>        |
| Name (2)  | _____                | Signature | _____                                                                                    | Date | _____                |
| Name (3)  | _____                | Signature | _____                                                                                    | Date | _____                |
| Name (4)  | _____                | Signature | _____                                                                                    | Date | _____                |
| Name (5)  | _____                | Signature | _____                                                                                    | Date | _____                |
| Name (6)  | _____                | Signature | _____                                                                                    | Date | _____                |
| Name (7)  | _____                | Signature | _____                                                                                    | Date | _____                |
| Name (8)  | _____                | Signature | _____                                                                                    | Date | _____                |
| Name (9)  | _____                | Signature | _____                                                                                    | Date | _____                |
| Name (10) | _____                | Signature | _____                                                                                    | Date | _____                |
| Name (11) | _____                | Signature | _____                                                                                    | Date | _____                |
| Name (12) | _____                | Signature | _____                                                                                    | Date | _____                |
| Name (13) | _____                | Signature | _____                                                                                    | Date | <input type="text"/> |
| Name (14) | _____                | Signature | _____                                                                                    | Date | _____                |
| Name (15) | _____                | Signature | _____                                                                                    | Date | _____                |
| Name (16) | _____                | Signature | _____                                                                                    | Date | _____                |
| Name (17) | _____                | Signature | _____                                                                                    | Date | _____                |
| Name (18) | _____                | Signature | _____                                                                                    | Date | _____                |
| Name (19) | _____                | Signature | _____                                                                                    | Date | _____                |
| Name (20) | _____                | Signature | _____                                                                                    | Date | _____                |
